# Supplementary material
Source: publisher figshare collection journal article supplement (https://acs.figshare.com/ndownloader/files/5199010)

# Intermolecular $^2hJ_{\text{NN}}$ -coupling in Multiply Hydrogen-bonded Ureidopyrimidinone Dimers in Solution

*Serge H. M. Söntjens, Marcel H. P. van Genderen, Rint P. Sijbesma\**

*Department of Macromolecular and Organic Chemistry, Eindhoven University of Technology, P.O.  
Box 513, 5600 MB Eindhoven, The Netherlands.*

## Contents:

|                                                                                                              |       |
|--------------------------------------------------------------------------------------------------------------|-------|
| General Experimental Procedures                                                                              | S2    |
| Synthesis of compounds <b>2</b> , <b>3</b> , <b>4a</b> , <b>5a</b> .                                         | S2-S4 |
| $^1\text{H}$ -NMR spectra of compound <b>5a</b> (unlabeled)                                                  | S5    |
| $^{13}\text{C}$ -NMR spectrum of compound <b>5a</b> (unlabeled)                                              | S6    |
| $^1\text{H}$ -NMR <b>5a</b> $^{15}\text{N}$ -labeled                                                         | S7    |
| $^{13}\text{C}$ -NMR spectrum of compound <b>5a</b> ( $^{15}\text{N}$ -labeled)                              | S8    |
| Comparison of $^{13}\text{C}$ NMR spectra of <b>5a</b> (unlabeled) and <b>5a</b> ( $^{15}\text{N}$ -labeled) | S9    |

**General Experimental Procedures.**  $^1\text{H}$  and  $^{13}\text{C}$  chemical shifts ( $\delta$ ) are reported in ppm relative to TMS. Solution  $^{15}\text{N}$ -NMR experiments were recorded at 50.6 MHz,  $^{15}\text{N}$  chemical shifts ( $\delta$ ) are reported in ppm relative to liquid  $\text{NH}_3$ . Determination of  $J$ -coupling constants was performed by deconvolution of the spectra. S-Ethylthiuronium bromide was synthesized according to literature.<sup>1</sup>

**Guanidinium picrate- $^{15}\text{N}_1$  2.** S-Ethylthiuronium bromide (3.1 g, 20 mmol) was dissolved in 10 mL 2 N NaOH solution and was subsequently put under argon flow. The argon exiting the reaction vessel was passed through a double Drechsel bottle setup filled with 10%  $\text{H}_2\text{O}_2$ , to oxidize any evolving ethanethiol in the subsequent reaction. To the reaction vessel a solution of ammonium chloride- $^{15}\text{N}$  (1.0 g, 19 mmol) in 8 mL of warm water was added, and the reaction mixture was heated to 70°C for 2 h. The production of ethanethiol was evident as mild gas evolution and showed the progress of the reaction. The reaction mixture was subsequently cooled, poured in a solution of picric acid in ethanol (100 mL, 0.272 M) and heated to reflux for 15 min. The yellow microcrystalline guanidinium picrate- $^{15}\text{N}_1$  which formed upon slow cooling of this solution was collected by filtration, washed with ethanol and dried *in vacuo* at 50°C to afford 4.0 g of crude compound. This crude product was used without further purification.  $^1\text{H}$ -NMR (DMSO):  $\delta$  8.60 (s, 2H, picrate CH), 6.91 (d, 2H,  $J = 91.2$  Hz,  $^{15}\text{NH}_2$ ), 6.91 (s, 4H,  $^{14}\text{NH}_2$ ).  $^{13}\text{C}$ -NMR (DMSO):  $\delta$  166.3, 163.3 (d,  $J = 19.8$  Hz), 147.2, 130.7, 129.9.  $^{15}\text{N}$ -NMR (DMSO)  $\delta$  78.2 (triplet of quintets,  $^1J_{\text{NH}} = 91.2$  Hz,  $^3J_{\text{NH}} = 2.2$  Hz).

**6-Tridecylisocytosine- $^{15}\text{N}_1$  3.** A solution of guanidinium picrate- $^{15}\text{N}_1$  (1.1 g, 3.5 mmol), ethyl-3-oxohexadecanoate (1.6 g, 1.5 eq), and KOH (220 mg, 1.1 eq) were heated to reflux temperature for 18 h in

---

(1) Brand, E.; Brand, F. C. In: *Org. Synth., Coll. Vol. 3*; John Wiley & Sons, Inc.: New York, 1955, p 440

50 mL ethanol. The reaction mixture was filtered at high temperature, to remove potassium picrate, and subsequently cooled to allow for the precipitation of the product as a tan paste, which was collected by filtration, recrystallized from ethanol and dried *in vacuo* at 50°C to afford 840 mg of the crude product (83%). <sup>1</sup>H-NMR δ 10.56 (s, 1H, OH), 6.40 (s+d, 2H, J = 89.0 Hz, <sup>15</sup>NH<sub>2</sub> + <sup>14</sup>NH<sub>2</sub>), 5.34 (s, 1H, CH), 2.19 (t, 2H, C5-H<sub>2</sub>), 1.50 (m, 2H, C6-CH<sub>2</sub>CH<sub>2</sub>), 1.2-1.3 (br. s, 20H), 0.83 (t, 3H, CH<sub>3</sub>). <sup>13</sup>C-NMR (DMSO) δ 170.5, 163.5, 156.2, 142.5 (impurity), 125.9 (impurity), 100.3, 39.9, 39.7, 37.7, 32.0, 29.7 (multiple peaks), 29.5, 29.4, 28.2, 22.8, 14.6. <sup>15</sup>N-NMR δ 201.7, 151.1, 76.6.

**N-Butylaminocarbonyl-6-tridecyl-isocytosine-<sup>15</sup>N<sub>1</sub> 4a.** Butyl isocyanate (0.1 g) was added to a solution of 6-tridecylisocytosine-<sup>15</sup>N<sub>1</sub> (300 mg, 1 mmol) in DMF (30 mL) at 90°C under an argon atmosphere. The reaction mixture was heated further for another 4½ h, after which it was cooled to 4°C to facilitate the crystallization of the product as a white microcrystalline material which was collected by filtration, washed with acetone and dried *in vacuo* at 50°C affording 330 mg of a 99% pure sample (85%). An analytically pure sample was obtained by recrystallization from acetic acid. mp 119°C. <sup>1</sup>H-NMR δ 13.18 (s+d, 1H, J = 93.0 Hz, N1-H), 11.88 (s+d, 1H, J = 91.2, C2-NH), 10.17 (t, 1H, J = 4.6 Hz, NHCH<sub>2</sub>), 5.82 (s, 1H, C5-H), 3.25 (q, 2H, J = 6.6 Hz, NHCH<sub>2</sub>), 2.45 (t, 2H, J = 7.5 Hz, C6-CH<sub>2</sub>), 1.6 (br. m, 4H), 1.2 (br. m, 22H), 0.93 (t, 3H), 0.88 (t, 3H). <sup>13</sup>C-NMR δ 173.2, 156.7, 154.8, 152.4, 105.9, 39.8, 32.7, 31.9, 31.6, 29.6 (multiple peaks), 28.8, 27.0, 22.7, 20.2, 14.1, 13.8. <sup>15</sup>N-NMR δ 213, 133 (J<sub>NH</sub> = 93.3 Hz), 117 (J<sub>NH</sub> = 90.4 Hz). FTIR (cm<sup>-1</sup>, enol): ν 3169, 3125, 2955, 2919, 2849, 2452, 1662, 1606, 1552, 1476, 1449, 1417, 1391, 1377. Elemental analysis: Calculated for C<sub>22</sub>H<sub>40</sub>N<sub>3</sub><sup>15</sup>N<sub>1</sub>O<sub>2</sub> (MW 393.6): C 67.3; H 10.3; N 14.3; Found: C 67.1; H 10.0; N 14.0.

**1,3-bis(1-methyl-1-(aminocarbonyl-6-tridecyl-isocytosine)ethyl)benzene 5a.** 1,3-Bis(1-isocyanato-1-methyl-ethyl)benzene (0.33 g, 1.35 mmol) and 6-tridecylisocytosine (0.87 g, 2.97 mmol) were heated in dry pyridine (5mL) at 90 °C for 3h. The product was taken up in dichloromethane, washed with 1N aqueous HCl (3 × 50 mL), with brine, and the solution was dried over MgSO<sub>4</sub>. The

crude product was purified by column chromatography using dichloromethane/methanol 98:2 v/v as eluent to yield 0.66 g (60%) of **5a** as a white solid. <sup>1</sup>H-NMR (CDCl<sub>3</sub>) 13.03 (s), 12.87 (s), 12.63 (s), 12.23 (s), 12.00 (s), 11.88 (s), 10.92 (s), 10.56 (s), 10.33 (s), 10.26 (s) 10.17 (s), 8.03 (s), 7.73 (s), 7.45 (s), 7.40-7.16 (multiple peaks), 5.82 (s), 5.71 (s), 5.45 (s), 5.34 (s), 2.53 (m), 2.29 (t), 2.16 (t), 1.89 (m), 1.71 (m), 1.53 (m), 1.10 (m), 0.88 (t). <sup>13</sup>C-NMR (CDCl<sub>3</sub>). 172.5, 172.4, 172.3, 171.0, 170.6, 157.3, 156.3, 156.0, 155.7, 154.9, 154.7, 151.9, 151.0, 148.6, 148.5, 147.1, 146.3, 129.0, 128.0, 122.8, 122.5, 121.8, 121.7, 121.6, 120.1, 105.8, 105.4, 105.0, 99.9, 56.9, 56.4, 55.9, 55.4, 37.3, 34.7, 34.0, 33.6, 32.6, 32.5, 32.3, 31.9, 29.6, 29.4, 29.3, 29.2, 29.0, 28.1, 27.2, 26.9, 26.8, 26.5, 25.6, 25.5, 22.7, 14.1 ppm. FTIR (neat, ATR): 3209, 2922, 2852, 1698, 1661, 1642, 1578, 1522, 1456, 1250 cm<sup>-1</sup>.

**1,3-bis(1-methyl-1-(aminocarbonyl-6-tridecyl-isocytosine-<sup>15</sup>N)ethyl)benzene 5a.** Was prepared from 1,3-Bis(1-isocyanato-1-methyl-ethyl)benzene (26 mg, 0.1 mmol) and 6-tridecylisocytosine-<sup>15</sup>N<sub>1</sub> (74 mg, 0.26 mmol) in a similar way as the unlabeled material. The crude product was recrystallized from ethanol twice to afford 50 mg of the product as an off-white microcrystalline product (60%). <sup>1</sup>H-NMR (CDCl<sub>3</sub>) 13.03 (s), 12.87 (s+d, J = 94 Hz), 12.63 (s+d, J = 94 Hz), 12.23 (s+d, 94 Hz), 12.00 (s+d, J = 91 Hz), 11.88 (s+d, J = 90 Hz), 10.92 (s+d, J = 91 Hz), 10.56 (s), 10.33 (s), 10.26 (s) 10.17 (s), 8.03 (s), 7.73 (s), 7.45 (s), 7.40-7.16 (multiple peaks), 5.82 (s), 5.71 (s), 5.45 (s), 5.34 (s), 2.53 (m), 2.29 (t), 2.16 (t), 1.89 (m), 1.71 (m), 1.53 (m), 1.10 (m), 0.88 (t). <sup>13</sup>C-NMR (CDCl<sub>3</sub>). 172.5 (br), 170.7 (br), 166.2 (br), 157.2 (br), 156.2 (br), 155.5 (br), 154.8 (br), 152.0, 148.6, 148.5, 147.1, 146.3, 129.0, 127.9, 122.8, 122.6, 121.70, 121.59, 121.53, 120.0, 105.8, 105.3, 104.9, 56.9 (d, J = 6 Hz), 56.3 (d, J = 5 Hz), 55.8 (d, J = 6 Hz), 55.3 (d, J = 5.7 Hz), 37.3, 34.6, 33.9, 33.6, 32.6, 32.5, 32.2, 31.9, 29.6, 29.4, 29.3, 29.2, 29.0, 28.1, 27.1, 26.8, 26.5, 25.6, 25.5, 22.7, 14.1. ppm. ESI-MS: 833.4 (M+H<sup>+</sup>), 855.4 (M+Na<sup>+</sup>), 871.4 ((M+K<sup>+</sup>)).

$^1\text{H}$ -NMR spectra of compound **5a** (unlabeled)

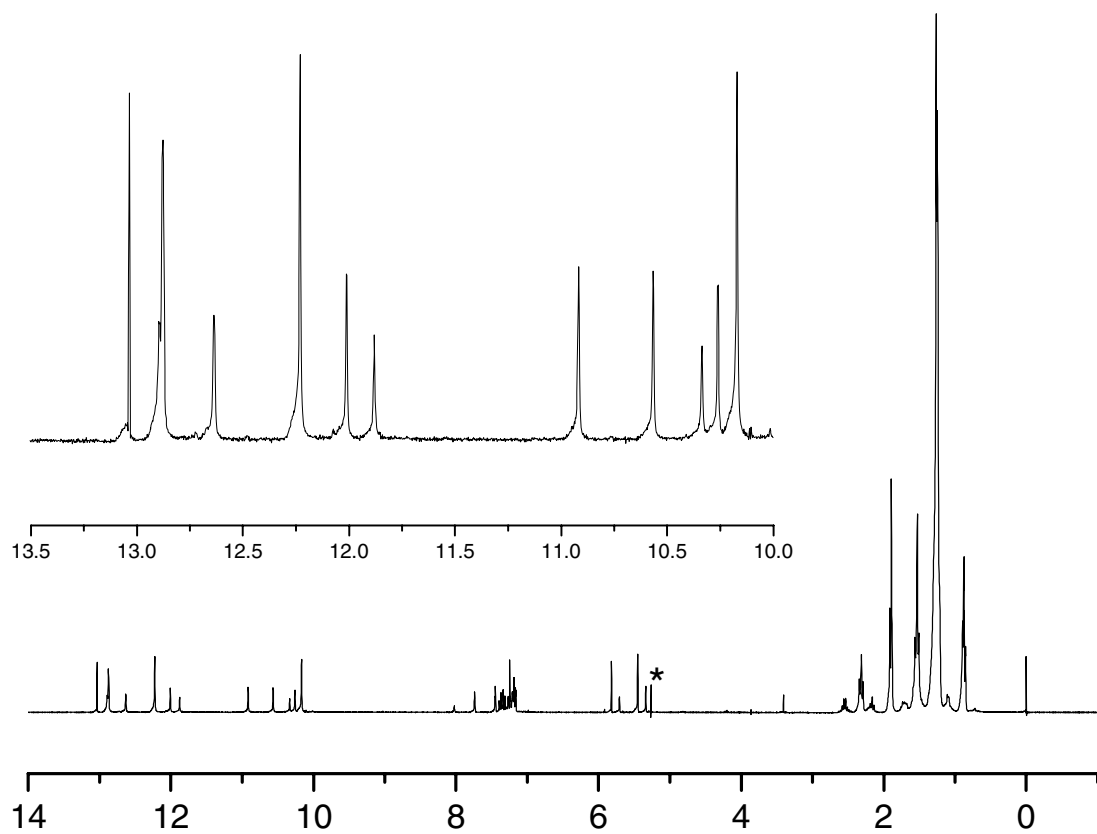

$^{13}\text{C}$ -NMR spectrum of compound **5a** (unlabeled)

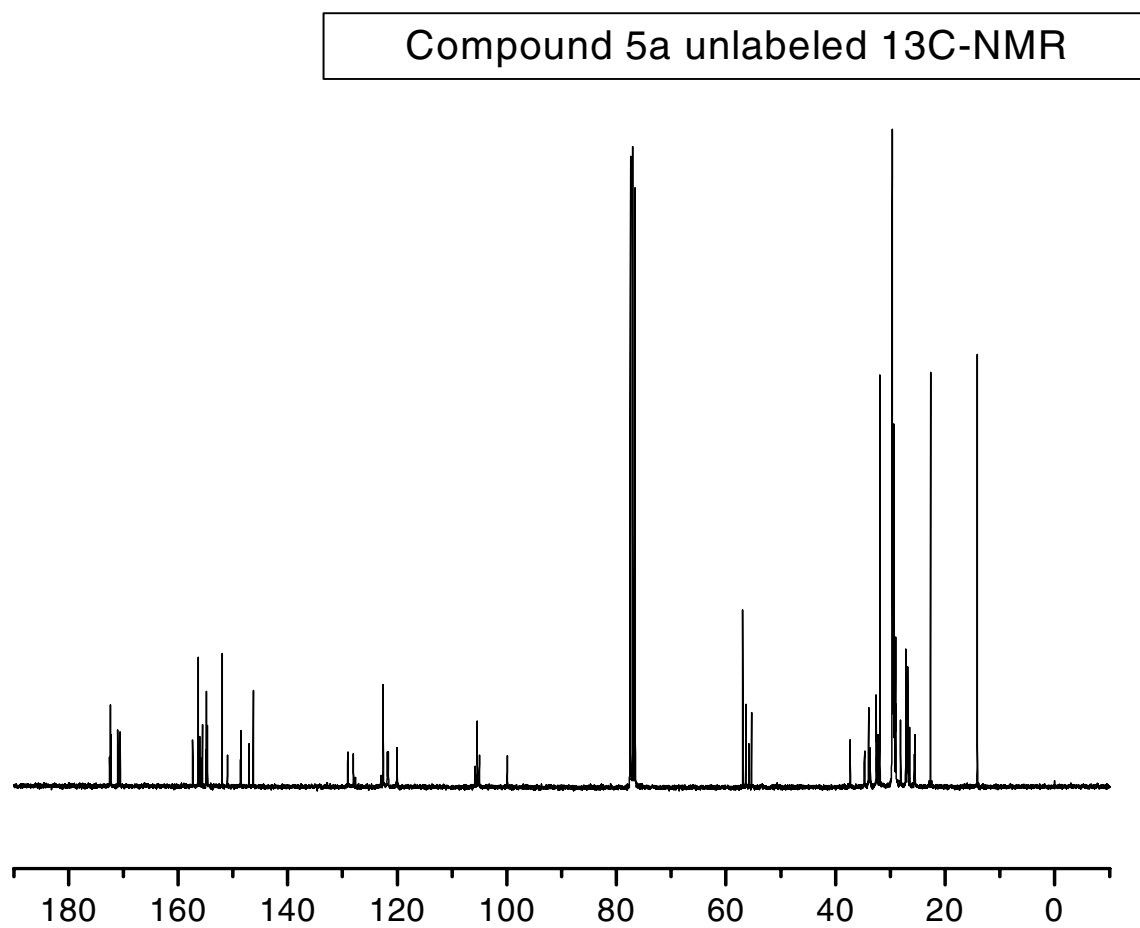

$^1\text{H}$ -NMR **5a**  $^{15}\text{N}$  labeled

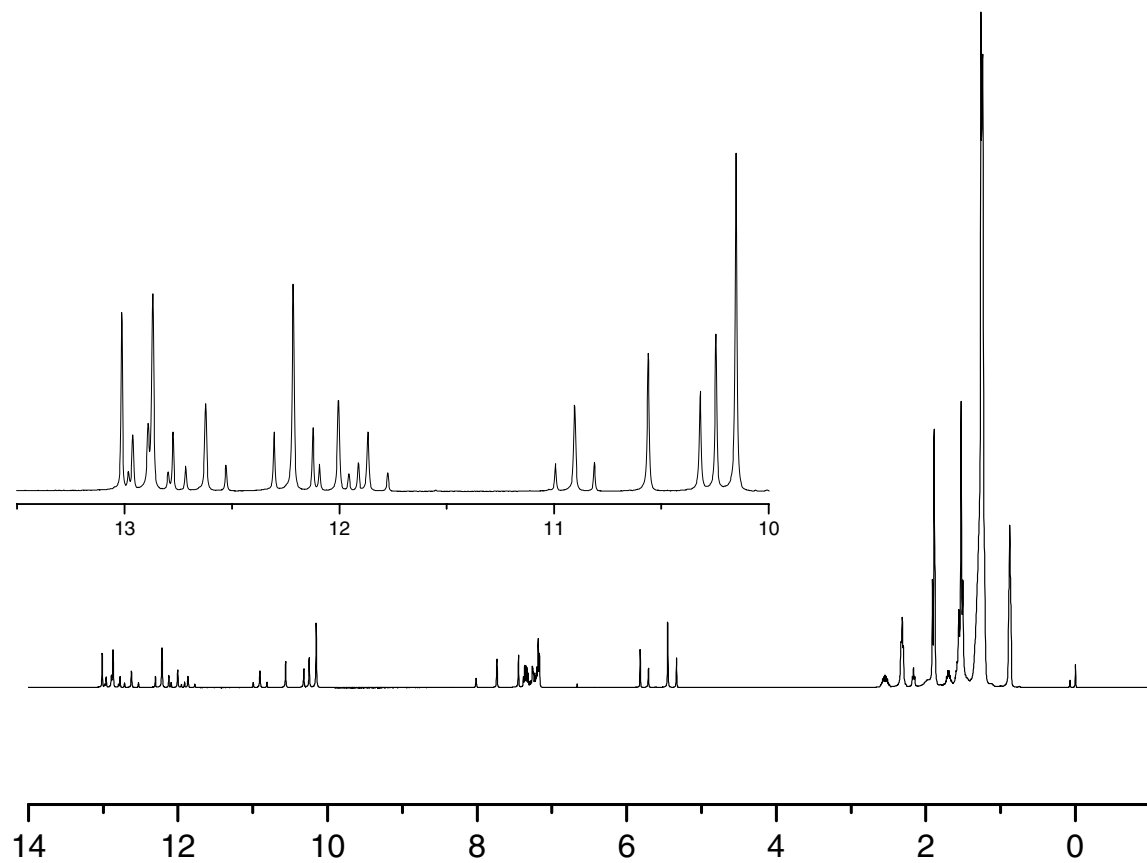

$^{13}\text{C}$  NMR **5a** (labeled)

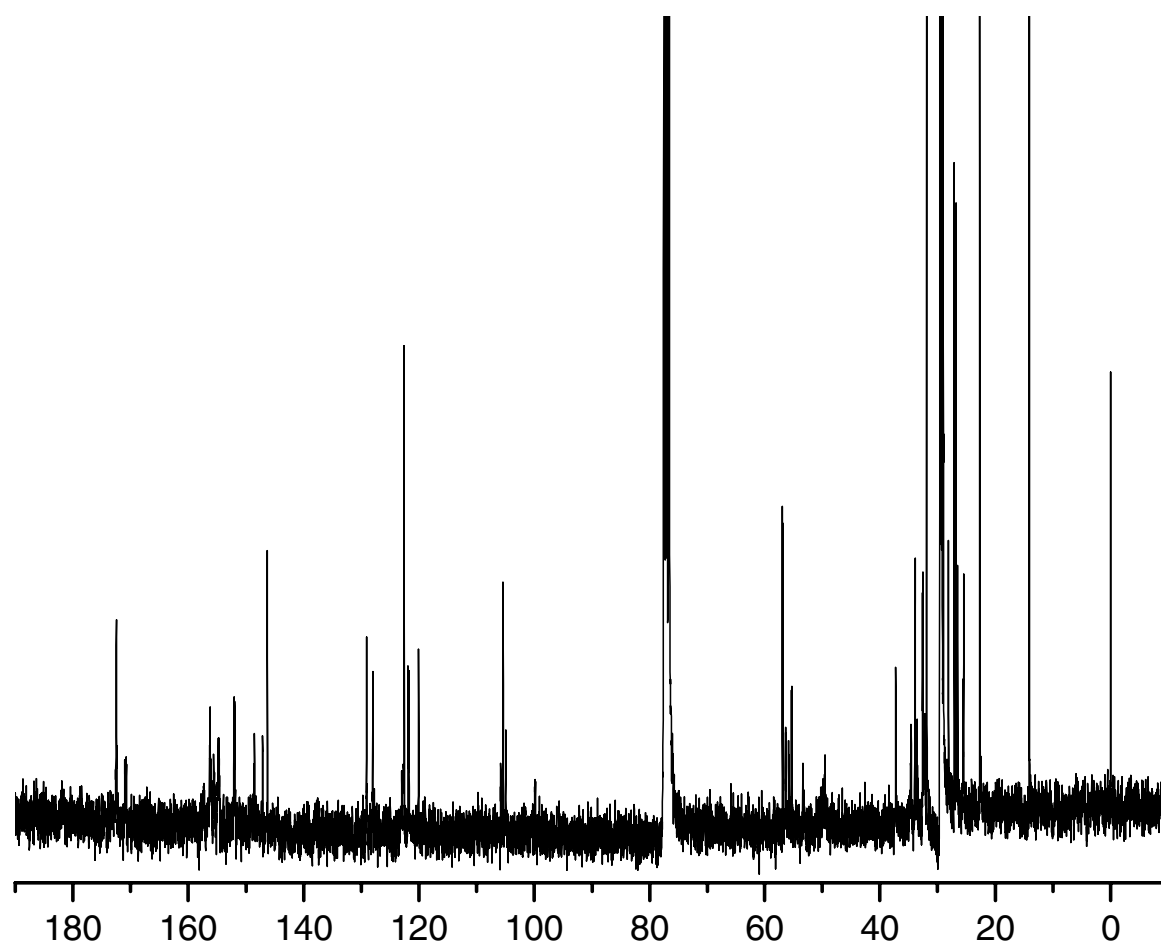



Comparison of  $^{13}\text{C}$  NMR spectra of **5a** (unlabeled) and **5a** (labeled)

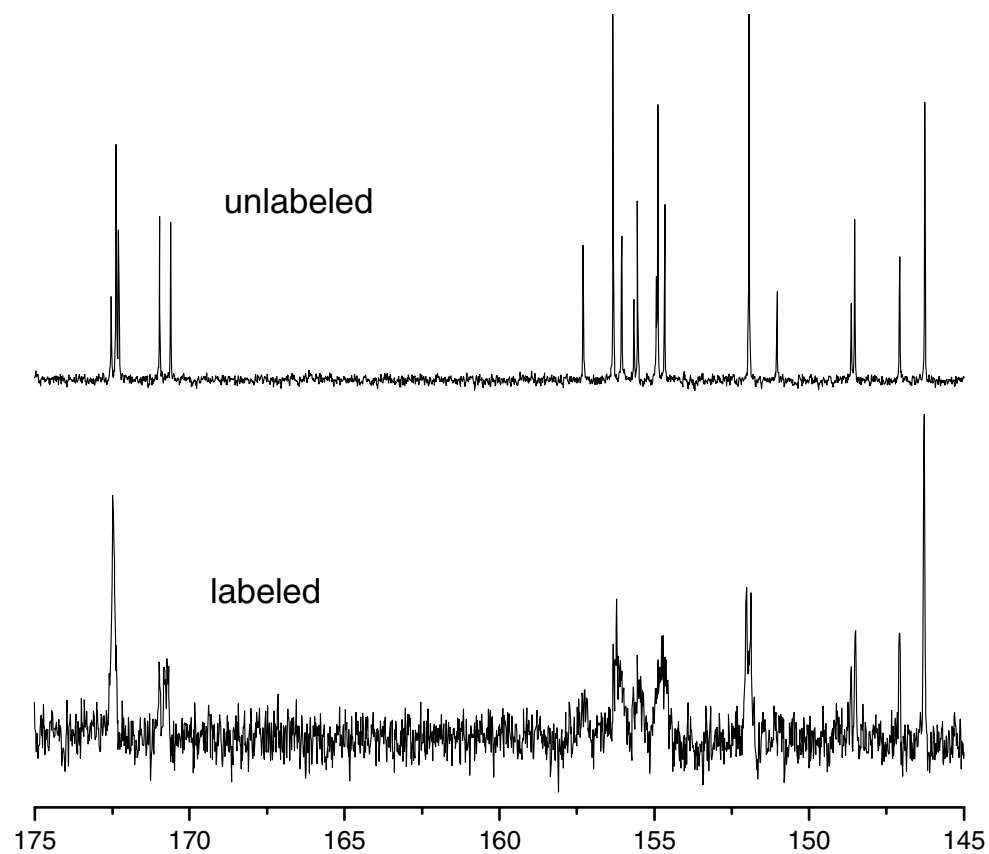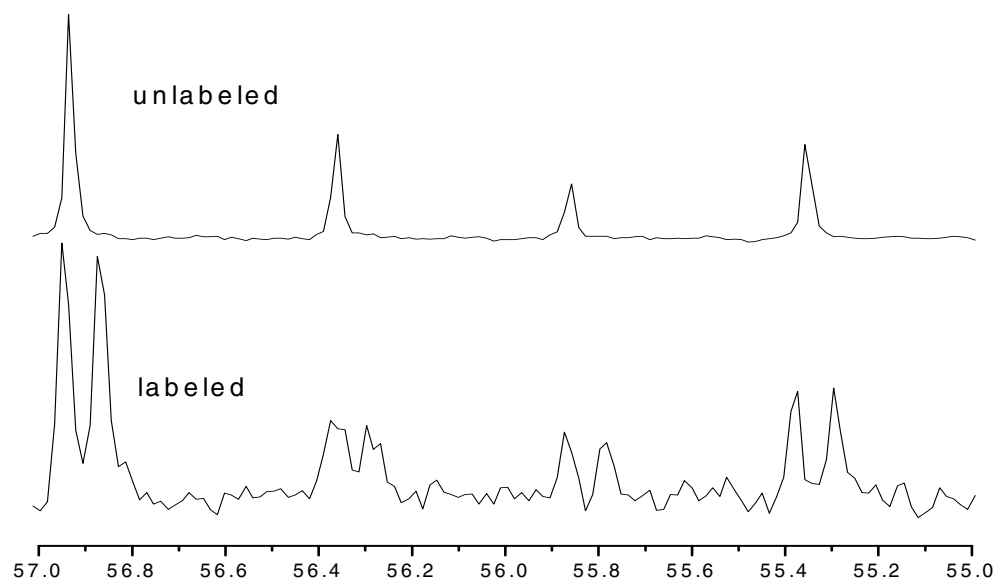

Supplement: Supplementary file 1 [file 5199010]
